# Supplementary material for: Pretreatment of miscanthus using 1,3-dimethyl-imidazolium methyl phosphonate (DMIMMPh) ionic liquid for glucose recovery and ethanol production
Source: Royal Society of Chemistry journal article supplement (doi:10.1039/c5ra08946h), 2015-01-01
Supplement: c5ra08946h1.pdf [file c5ra08946h1.pdf]

## Pretreatment of miscanthus using 1,3-dimethyl-imidazolium methyl phosphonate (DMIMMPh) ionic liquid for glucose recovery and ethanol production

El-Sayed R. E. HASSAN,<sup>1</sup> Fabrice MUTELET,<sup>\*1</sup> Jean-Charles MOÏSE and Nicolas BROSSE<sup>2</sup>

<sup>1</sup> Laboratoire Réactions et Génie des Procédés (UMR CNRS 7274), Université de Lorraine, Nancy 54000, France

<sup>2</sup> Laboratoire d'Etude et de Recherche sur le MAteriau Bois, Faculté des Sciences et Techniques, Université de Lorraine, Bld des Aiguillettes, F-54500 Vandoeuvre-lès-Nancy, France

Figure S1. The solubility of miscanthus in ionic liquids

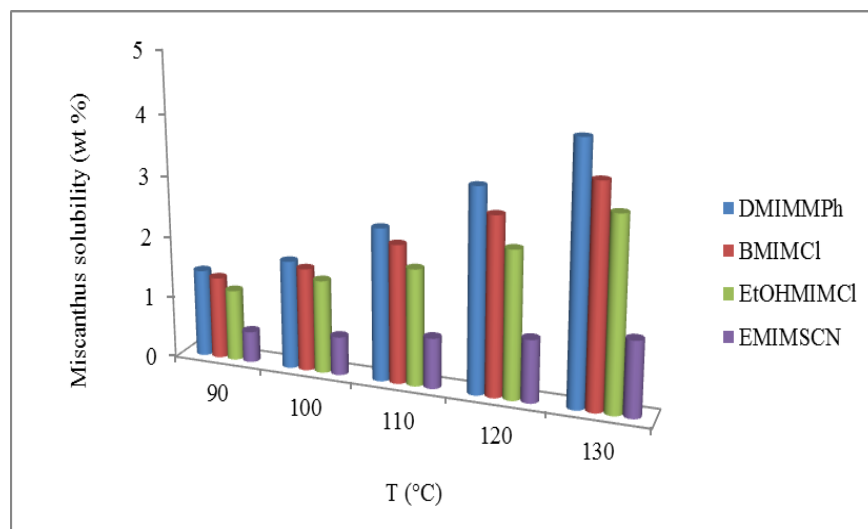

Figure S2. Microscopic images for raw miscanthus (0.2 mm size) in water (top), miscanthus dissolved in DMIMPh (middle), and for miscanthus dissolved in BMIMCl (bottom).

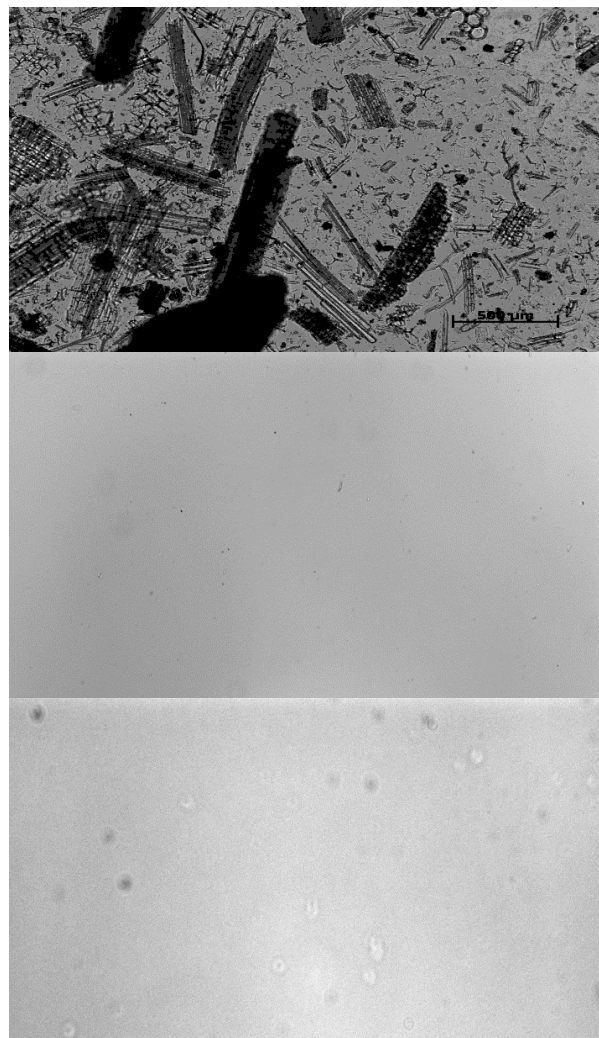

Figure S3. The response surface plots of the (a) miscanthus dissolution rate at mass fraction 4%, (b) miscanthus dissolution rate at temperature 110°C, (c) cellulose grade % at mass fraction 4%, and (d) cellulose grade % at time 14 hr resulting from the main effects of different variables, temperature, time and miscanthus mass fraction % for Miscanthus-DMIMPh mixture

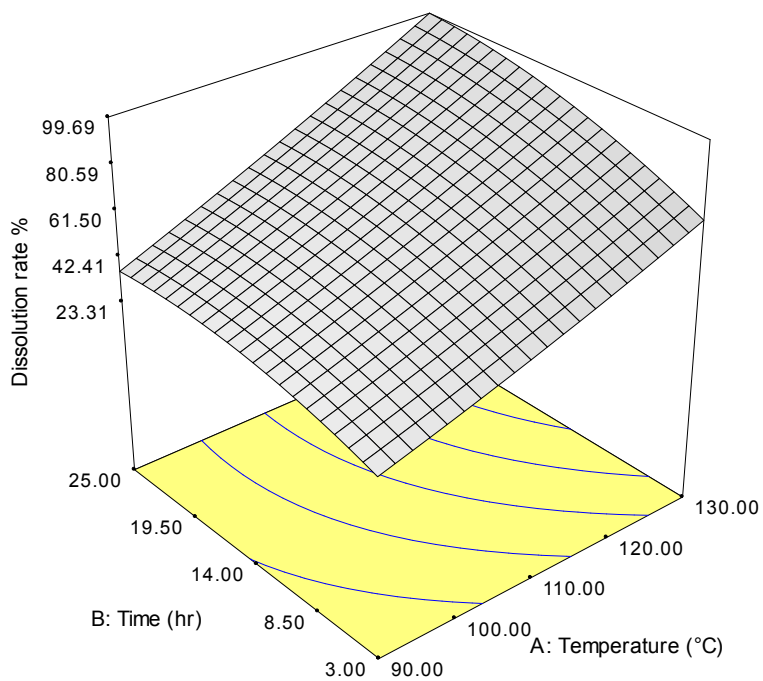

(a)

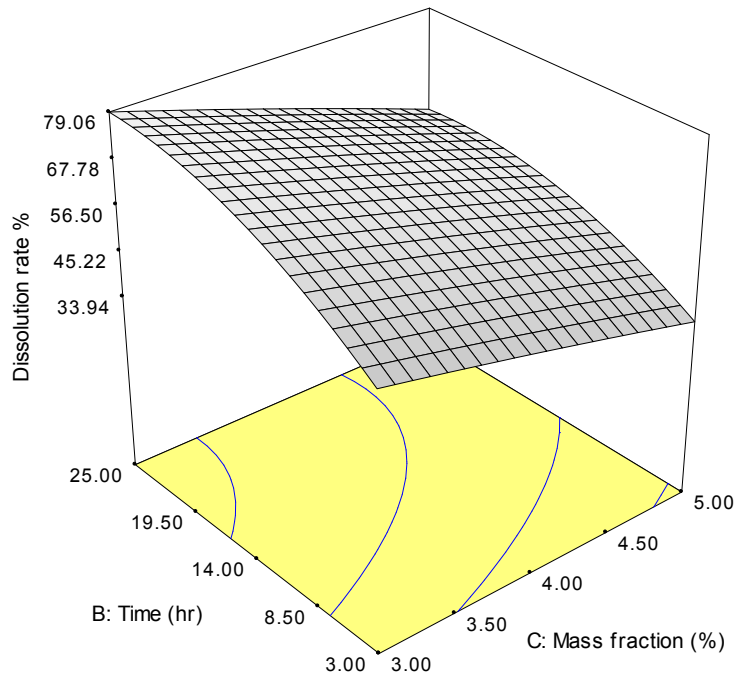

(b)

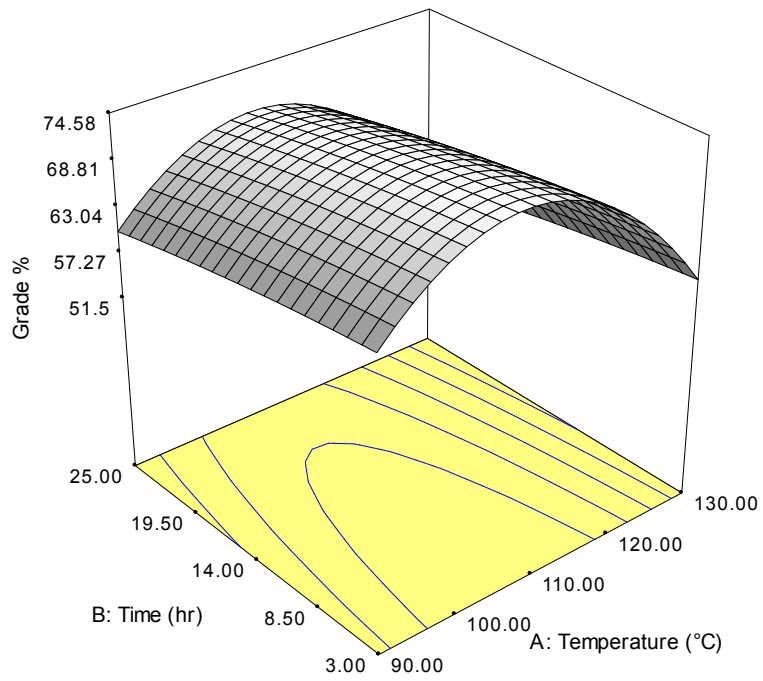

(c)

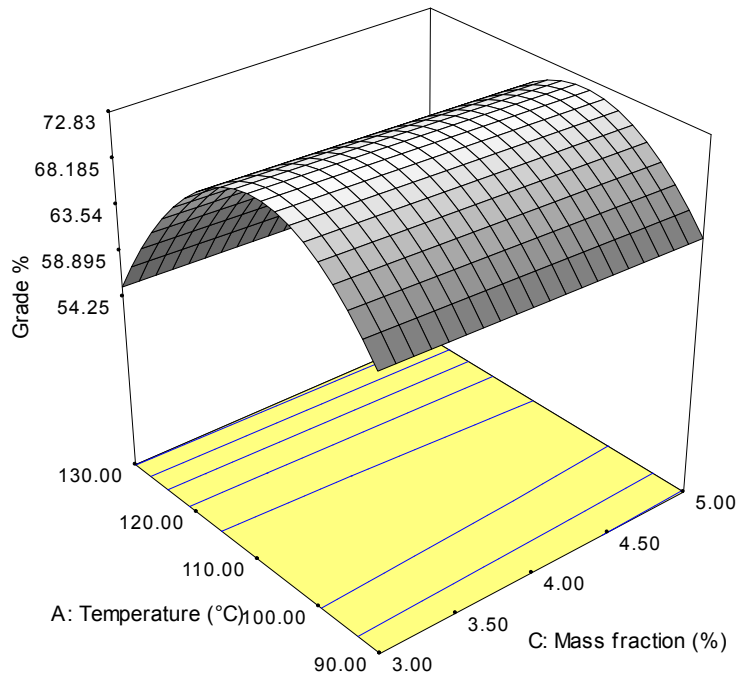

(d)

Figure S4.  $^1\text{H}$  NMR of (a) pure DMIMMPh, (b) DMIMMPh/DMSO (80:20) and (c) recycled DMIMMPh

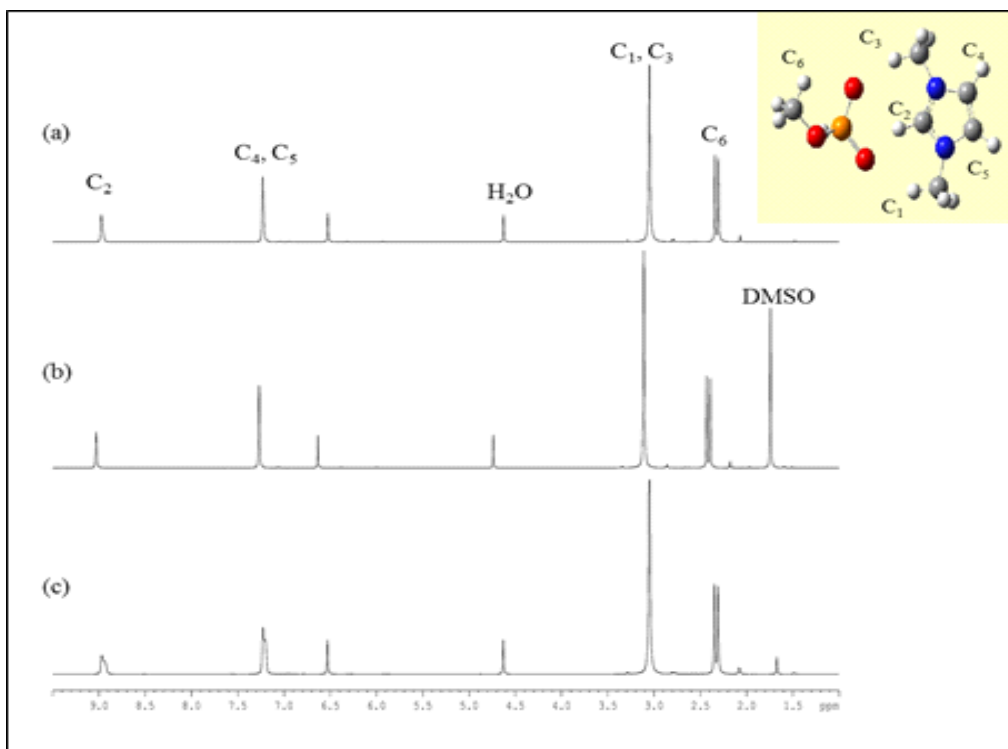

Figure S5. XRD of ■) miscanthus, ■) miscanthus residue and ■) cellulose-rich extract

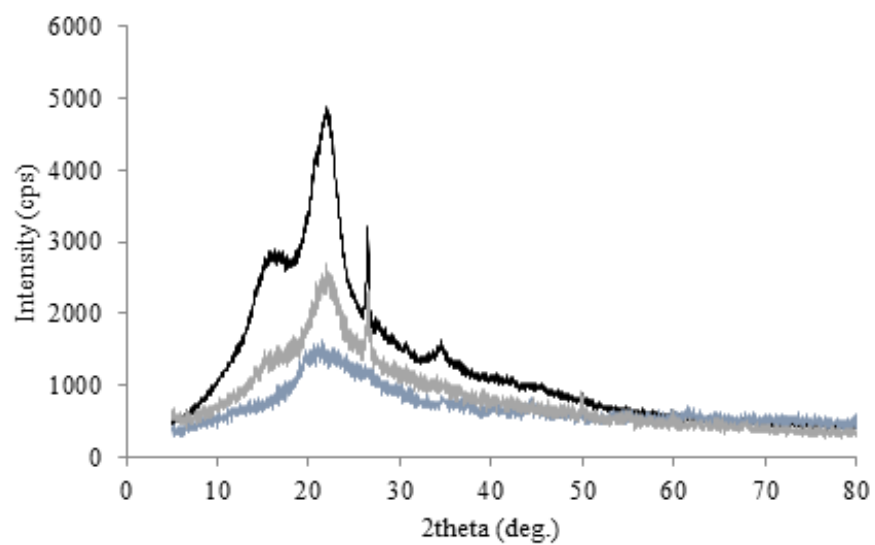

Figure S6. IR of ■) miscanthus, ■) miscanthus residue and ■) cellulose-rich extract

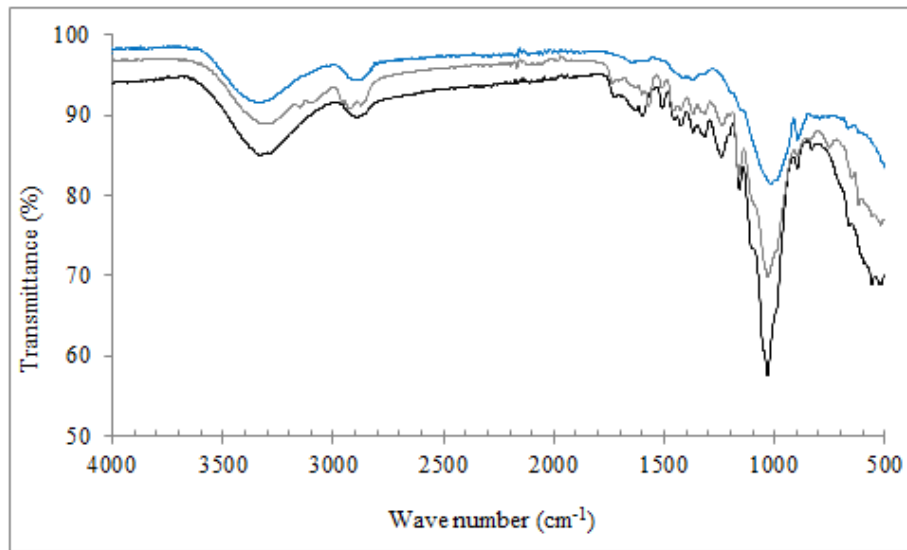



Figure S7. SEM images of (a) original miscanthus, (b) the cellulose-rich extract, and (c) miscanthus residue

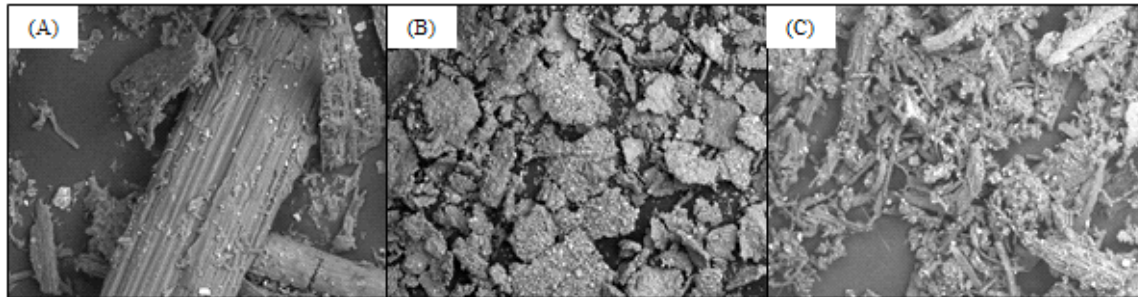

Figure S8. SEM images of A) microcrystalline cellulose and B) the cellulose-rich extract with DMIMMPH

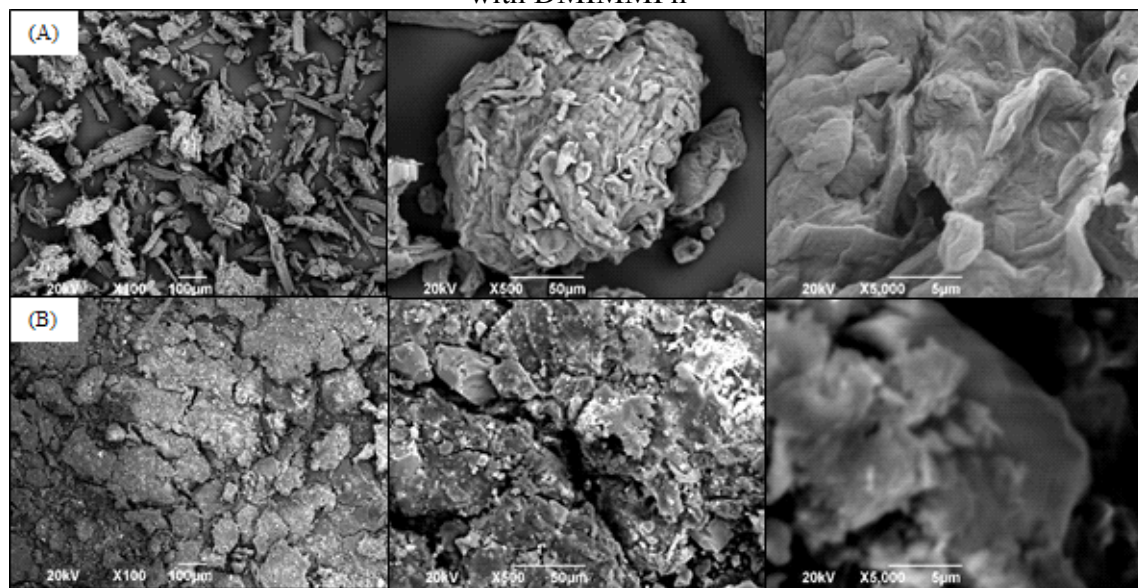

Table S1. GC operating conditions for composition analysis

|                      |                                                                      |
|----------------------|----------------------------------------------------------------------|
| Injector Temperature | 250°C                                                                |
| Carrier Gas          | Helium                                                               |
| Capillary column     | WCOT Ulti-Metal coated with HT-SIMDIST-CB (10 m × 0.53 mm × 0.53 μm) |
| Flow rate            | 2 mL.min <sup>-1</sup>                                               |
| Column Oven          | 100°C                                                                |
| Detector Type        | FID                                                                  |
| Detector Temperature | 250°C                                                                |

Table S2 Dissolution of different biomass species in imidazolium based ionic liquids, data from the literature

| Biomass              | Ionic Liquid | Solubility (wt%) | Time (hr) | Temperature (°C) | Reference |
|----------------------|--------------|------------------|-----------|------------------|-----------|
| Miscanthus           | EMIMOAC      | 5                | 6-8       | 120              | 22        |
|                      | BMIMOAC      | 4                | 8-10      | 120              | 22        |
|                      | BMIMCl       | 3                | 8         | 120              | 22        |
|                      | EMIMCl       | 4                | 8         | 120              | 22        |
|                      | DMIMDMP      | 4                | 10        | 120              | 22        |
|                      | EMIMDMP      | 4                | 15        | 120              | 22        |
|                      | EMIMHSO4     | 2                | 12-14     | 120              | 22        |
|                      | BMIMSCN      | <1               | >24       | 130              | 22        |
| Southern yellow pine | EMIMOAC      | 4.93             | 16        | 110              | 27        |
| Southern yellow pine | BMIMCl       | 2.6              | 16        | 110              | 27        |
| Wool keratin         | BMIMCl       | 4                | 10        | 100              | 38        |
| Pine                 | AMIMCl       | 1.3              | 24        | 100              | 39        |
| Pine                 | AMIMCl       | 3.35             | 24        | 120              | 39        |
| Poplar wood          | EMIMOAC      | 5                | 12        | 110              | 40        |

Table S3. Factor levels of the studied variables for the miscanthus-DMIMMPH mixture

| Symbol | Parameter     | Unit  | (-1)  | (0)    | (+1)   |
|--------|---------------|-------|-------|--------|--------|
| A      | Temperature   | (°C)  | 90.00 | 110.00 | 130.00 |
| B      | Time          | (hr.) | 3.00  | 14.00  | 25.00  |
| C      | Mass fraction | (%)   | 3.00  | 4.00   | 5.00   |

Table S4. Box-Behnken Design with different responses at different experimental combinations (Runs) for the miscanthus-DMIMMPH mixture

| Exp.<br>Run | Studied variables   |               |                      | Responses             |                      |                         |
|-------------|---------------------|---------------|----------------------|-----------------------|----------------------|-------------------------|
|             | Temperature<br>(°C) | Time<br>(hr.) | Mass<br>fraction (%) | Dissolution<br>rate % | Cellulose<br>Grade % | Cellulose<br>Recovery % |
| 1           | 110.00              | 14.00         | 4.00                 | 61.50                 | 72                   | 85.00                   |
| 2           | 90.00               | 3.00          | 4.00                 | 24.00                 | 66                   | 40.50                   |
| 3           | 110.00              | 14.00         | 4.00                 | 61.50                 | 72                   | 85.00                   |
| 4           | 110.00              | 3.00          | 5.00                 | 31.00                 | 73                   | 48.00                   |
| 5           | 90.00               | 14.00         | 5.00                 | 27.00                 | 63                   | 41.00                   |
| 6           | 130.00              | 25.00         | 4.00                 | 99.00                 | 51                   | 78.00                   |
| 7           | 130.00              | 14.00         | 3.00                 | 99.00                 | 55                   | 81.00                   |
| 8           | 110.00              | 14.00         | 4.00                 | 61.40                 | 72                   | 85.00                   |
| 9           | 110.00              | 14.00         | 4.00                 | 61.50                 | 72                   | 85.00                   |
| 10          | 130.00              | 3.00          | 4.00                 | 68.00                 | 58                   | 82.00                   |
| 11          | 110.00              | 25.00         | 3.00                 | 82.00                 | 70                   | 73.00                   |
| 12          | 90.00               | 14.00         | 3.00                 | 44.00                 | 64                   | 70.00                   |
| 13          | 110.00              | 14.00         | 4.00                 | 61.50                 | 72                   | 85.00                   |
| 14          | 90.00               | 25.00         | 4.00                 | 36.00                 | 59                   | 57.00                   |
| 15          | 110.00              | 3.00          | 3.00                 | 55.00                 | 74                   | 73.00                   |
| 16          | 110.00              | 25.00         | 5.00                 | 51.00                 | 69                   | 62.00                   |
| 17          | 130.00              | 14.00         | 5.00                 | 80.50                 | 54                   | 80.00                   |

Table S5. Analysis of variance (ANOVA) data for the miscanthus-DMIMMPh mixture

| The stastical parameters | Dissolution rate % | Cell. Grade % | Cell. Recovery % |
|--------------------------|--------------------|---------------|------------------|
| The standard deviation   | 2.67               | 0.85          | 1.86             |
| R-squared                | 0.9939             | 0.9946        | 0.9939           |
| Adequate precision       | 38.090             | 35.868        | 32.401           |
| The Model F-value        | 126.75             | 144.18        | 126.40           |
